# Supplementary material for: Weighted Statistical Binning: Enabling Statistically Consistent Genome-Scale Phylogenetic Analyses
Source: PubMed Central journal article supplement (PMC4472720; doi:10.1371/journal.pone.0129183), 2015-06-18
Supplement: pone.0129183.s001.pdf [file pone.0129183.s001.pdf]

| Dataset   | Model condition | Gene tree error (%) |           |           |
|-----------|-----------------|---------------------|-----------|-----------|
|           |                 | Unbinned            | Binned-50 | Binned-75 |
| Avian     | 250bp           | 79                  | 57        | n.a.      |
|           | 500bp           | 69                  | 57        | n.a.      |
|           | 1000bp          | 55                  | 51        | n.a.      |
|           | 1500bp          | 46                  | 45        | n.a.      |
| Mammalian | 250bp           | 60                  | n.a.      | 47        |
|           | 500bp           | 43                  | n.a.      | 35        |
|           | 1000bp          | 27                  | n.a.      | 26        |
| 15-taxon  | 100bp           | 77                  | 80        | 86        |
|           | 1000bp          | 36                  | 36        | 40        |
| 10-taxon  | Lower ILS       | 64                  | 58        | 51        |
|           | Higher ILS      | 69                  | 73        | 80        |

**Table S1. Gene tree estimation error, with and without binning for simulated datasets.** We show the average gene tree estimation error for the simulated datasets analyzed in this paper. Results are shown for fixed number of genes (1000 for avian and 200 for mammalian, 100 for 15-taxon and 100 for 10-taxon). We fixed the level of ILS to 1X for avian, mammalian and 15-taxon datasets; and varied the level of ILS for 10-taxon datasets with 100bp sequence length. Gene tree error is mean topological distance, measured using the missing branch rate between the true gene tree and all 200 bootstrap replicates of each estimated gene tree. For the supergene trees, each bootstrap replicate of each supergene tree is compared separately against each true gene tree for the genes put in that bin. “n.a.” stands for “not available”.
