# Supplementary material for: Weighted Statistical Binning: Enabling Statistically Consistent Genome-Scale Phylogenetic Analyses
Source: PubMed Central journal article supplement (PMC4472720; doi:10.1371/journal.pone.0129183), 2015-06-18
Supplement: pone.0129183.s002.pdf [file pone.0129183.s002.pdf]

| Dataset   | Model condition   | Average bootstrap support (%) |
|-----------|-------------------|-------------------------------|
| Avian     | 250bp             | 27                            |
|           | 500bp             | 31                            |
|           | 100bp             | 51                            |
|           | 1500bp            | 60                            |
| Mammalian | 250bp             | 43                            |
|           | 500bp             | 63                            |
|           | 1000bp            | 79                            |
| 15-taxon  | 100bp             | 35                            |
| 15-taxon  | 1000bp            | 70                            |
| 10-taxon  | Lower ILS, 100bp  | 45                            |
|           | Higher ILS, 100bp | 37                            |

**Table S2. Average bootstrap support.** We show the average bootstrap support values of the estimated gene trees for the simulated datasets. Results are shown for fixed number of genes (1000 for avian and 200 for mammalian, 100 for 15-taxon and 100 for 10-taxon datasets). We fixed the level of ILS to 1X for avian, mammalian and 15-taxon datasets; and varied the level of ILS for 10-taxon datasets with 100bp sequence length.
